# Supplementary material
Source: HighWire-hosted journal article supplement (doi:10.1101/rna.073734.119)
Supplement: Supplemental_Material.pdf [file Supplemental_Material.pdf]

## Supplemental Material

### The presence of the ACA box in the archaeal H/ACA guide RNA allows atypical pseudouridylation

Mrinmoyee Majumder, Shaoni Mukhopadhyay, Parinati Kharel and Ramesh Gupta

#### METHODS

##### Construction of cloning vectors

Plasmid pKS<sup>+</sup>Metpro (Supplemental Fig. S5A) is a vector that contains an insert (sequence in Supplemental Fig. S6) within the multiple cloning site of pBlueScript KS<sup>+</sup> (Stratagene). The insert contains the promoter and terminator regions of the *H. volcanii* intron-containing elongator tRNA-Met gene, but not the structural gene. The two regions are separated by a *Sma*I site. A *Hind*III fragment of about 1.5 Kb in pHVH205-2 (Datta et al. 1989) contains the elongator tRNA-Met gene. This fragment of pHVH205-2 was subcloned into the *Hind*III site of pBlueScript KS<sup>+</sup>, such that the promoter of the gene was towards the *Kpn*I site of the multiple cloning site of the vector. Stepwise partial deletions at the *Taq*I sites downstream of the terminator reduced the insert size to about 250 bases that contained the gene and its promoter and terminator regions. Digestion by *Sma*I and religation of this 250-base-containing clone removed about 140 bases and produced pKS<sup>+</sup>Metpro. The 140-base fragment that was removed contained the main tRNA and its intron. This deletion was possible because there are two *Sma*I sites (CCCGGG) within the tRNA gene, one in each strand of the acceptor arm of the tRNA. In the tRNA transcript the two CCCGGG sequences pair in the acceptor stem.

Plasmid pDS2 is a derivative of the *E. coli*-*H. volcanii* shuttle vector pWL102 (Lam and Doolittle 1989) that contains the multiple cloning site of pBlueScript KS<sup>+</sup>. It has ampicillin as the selectable marker for *E. coli* and mevinolin for *H. volcanii*. Its construction is shown schematically in Supplemental Fig. S5B. pWL102 was digested with *Asp*718 (a *Kpn*I isoschizomer) and *Bam*HI, filled with Klenow enzyme and religated to produce pWL102BA. This removed certain restriction sites from the plasmid. Both

pWL102BA and pBlueScript KS<sup>+</sup> plasmids were completely digested by *Afl*III and partially digested by *Ssp*I. The 8.2 Kb *Afl*III- *Ssp*I fragment of pWL102BA and 1.2 Kb *Afl*III- *Ssp*I fragment of pBlueScript KS<sup>+</sup> were ligated together to produce pDS1. Plasmid pDS2 is an improved version of pDS1 in which adjacent *Hind*III, *Cl*aI and *Eco*RI sites near the Amp<sup>r</sup> locus were eliminated, by partial digestion with individual enzyme, filling in and religation. Thus, only one site (within the multiple cloning site) for each of these enzymes was retained.

### Gel-shift assays

About 0.1  $\mu$ M of [ $\alpha$ -<sup>32</sup>P]NTP-labeled guide RNA (WT or mutant) was mock-treated or mixed with 0.1  $\mu$ M recombinant *M. jannaschii* Cbf5 protein in 20  $\mu$ L reactions (20 mM Na-HEPES, pH 7.0, 150 mM NaCl, 0.75 mM DTT, 1.5 mM EDTA, 10% glycerol and 1  $\mu$ g yeast tRNA) and incubated at 68°C for 30 min. The samples were resolved by 4% native PAGE at 4°C in 0.5X TBE buffer for 6-8 h at 125 V. Resolved RNPs were visualized by phosphorimaging after drying the gels.

### SUPPLEMENTAL FIGURE LEGENDS

**Supplemental Figure S1.** Time course analyses of SL1 stem-loop RNP-mediated  $\Psi$  formation. Different sRNP:substrate (S) RNA ratios (as indicated on the side) were used in reactions similar to those shown in Fig. 3B and 3D to measure  $\Psi$  formation. The sRNP was 0.1  $\mu$ M in each reaction (i.e., 0.1  $\mu$ M of each of the four proteins and the guide RNA) and the substrate RNA was 0.01  $\mu$ M for the single turnover conditions and 0.2, 0.5 and 1.0  $\mu$ M for different multiple turnover conditions. Total mole  $\Psi$ /mole RNA was determined at different time points. Mean values of two independent reactions are plotted here using GraphPad Prism software. The inset amplifies the reaction curve for 0, 1, 2 and 5 min of the same plot.

**Supplemental Figure S2.** In vivo pseudouridylations by 1940 guide and 1942 guide were not consistent. The  $\Delta$ sR-h45 strain of *H. volcanii* was independently transformed with 1940 guide and 1942 guide (see schematics of the  $\Psi$  pockets in Figs. 4D and 6B). Total RNA of the transformants was treated as in Figs.

2C and 2E to determine  $\Psi$  formation at positions 1940 and 1942. Guides are indicated above the panels. Results of the two independent sets of the experiments are not similar (intensities of the bands at positions 1940 and 1942 are not similar in the two sets).

**Supplemental Figure S3.** The ACA box is required for binding of Cbf5 to RNA. Radiolabeled SL1 and SL2 RNAs and their variants (as in Fig. 6B) were incubated with recombinant *M. jannaschii* Cbf5, resolved by native PAGE and visualized by phosphorimaging. RNAs are designated above the panels and migration positions of free RNA (C0) and Cbf5-bound RNA (C1) are indicated on the sides.

**Supplemental Figure S4.** Time course analyses of  $\Psi$  formation using different mutations of SL1 guide RNA (schematics in Figs. 6B and 7A) under single turnover conditions (sRNP:substrate RNA - 10:1). Reaction conditions and analyses were done as in Supplemental Fig. S1.

**Supplemental Figure S5.** The  $\Delta sR-h45$  strain of *H. volcanii* was independently transformed with various mutants of pHSL1 and pHSL2 (schematics of the mutants in Fig. 7). Total RNA of the transformants were treated as in Figs. 2B-D to determine the modification status of U's at position 2605 in (A) and (B) and at positions 1940 and 1942 in (C) and (D). Mutants are indicated above each panel. (A) and (C) are primer extensions for U-specific reactions and (B) and (D) are for CMCT reactions. Asterisks next to the bands indicate unmodified U2605 in (A),  $\Psi$ 2605 in (B), unmodified U1940 and U1942 in (C), and  $\Psi$ 1940 and  $\Psi$ 1942 in (D). Some WT reaction figures are the same as in Fig. 2.

**Supplemental Figure S6.** Schematic presentation of cloning vectors. (A) pKS<sup>+</sup>Metpro. Here an insert containing promoter (P) and terminator (T) of *H. volcanii* elongator tRNA-Met gene (Datta et al. 1989) that are connected by a *Sma*I site (sequence in Supplemental Fig. S6), is cloned in the multiple cloning site of pBlueScript KS<sup>+</sup>. (B) Steps in conversion of pWL102 (Lam and Doolittle 1989) to pDS2 as described in the Methods section of Supplemental Material.

**Supplemental Figure S7.** Sequence of *KpnI-SacI* fragment of the pKS<sup>+</sup>Metpro. The promoter region (marked by single underline) and terminator region (marked by double underline) are indicated by P and T within square boxes, respectively. Various restriction sites are indicated above the sequence. The *SmaI* sequence connecting the two regions is included in a box. The arrow indicates the transcription start site.

**Supplemental Figure S8.** Northern blot analyses to show in vivo expression of mutant RNAs that did not produce  $\Psi$  at the appropriate positions. The RNAs isolated from these strains were separated by 6% PAGE. Mutants of SL1 (A) and SL2 (B) are indicated above each lane. <sup>32</sup>P-labeled probes used for hybridization are listed on the side of panels. 5S rRNA was used as a loading control.

**Supplemental Figure S9.** Coomassie blue-stained 15% SDS-PAGE gels of different recombinant *M. jannaschii* proteins purified by Ni-NTA chromatography alongside a protein ladder. Calculated sizes of the Cbf5, L7Ae, Nop10 and Gar1 proteins are approximately 41, 12, 7 and 7 kDa.

Figure S1

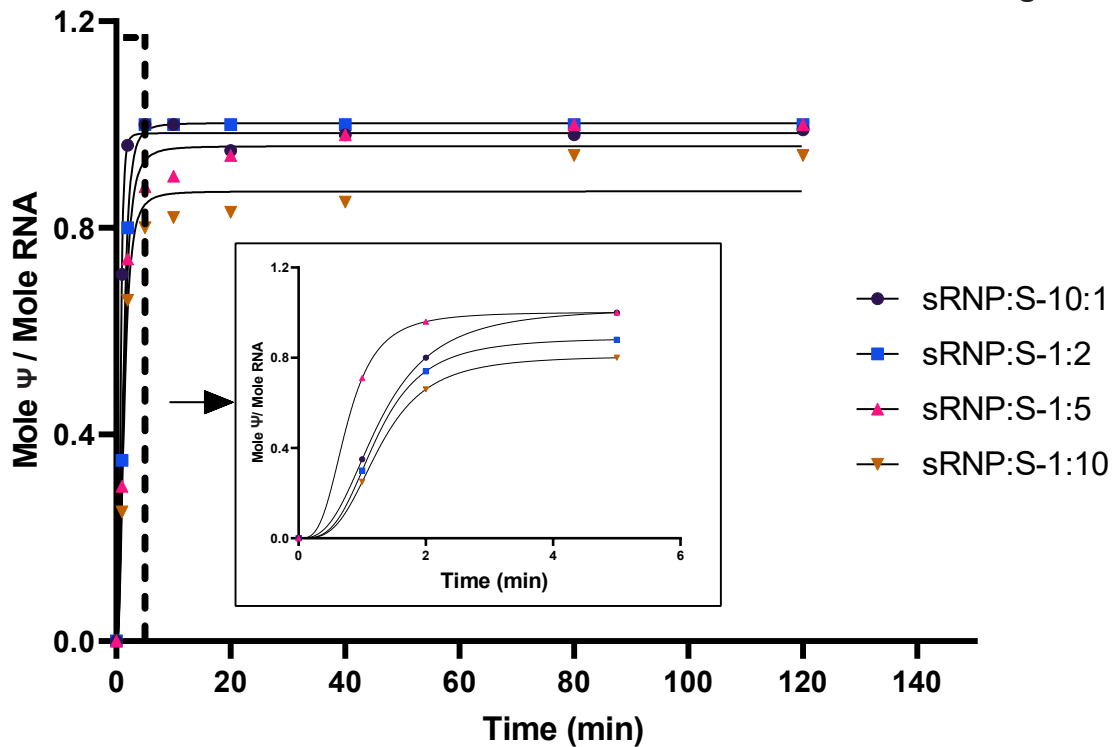

### Set A

### Set B

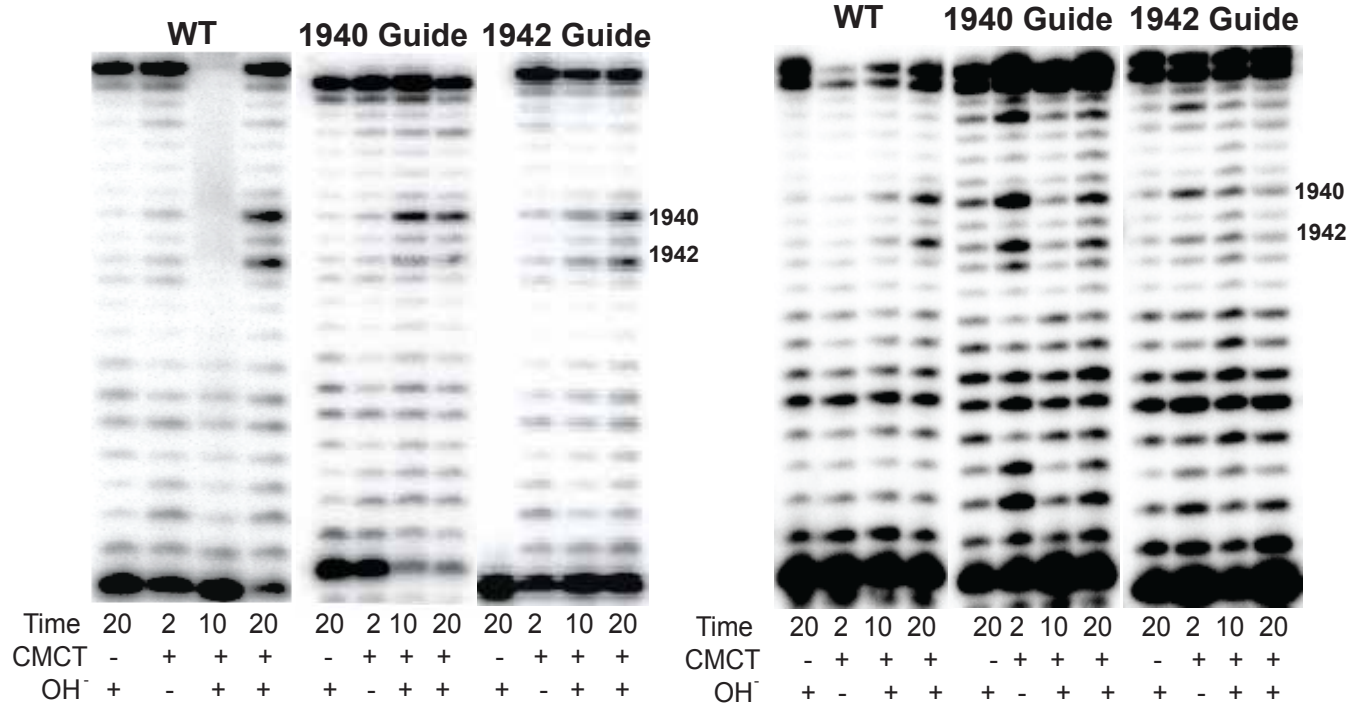

|        | SL1 |   | mSL1<br>(AUA-UGU) |   |        | 14+U<br>SL1 |   | 14+U mSL1<br>(AUA-UGU) |   |
|--------|-----|---|-------------------|---|--------|-------------|---|------------------------|---|
| Guide  | +   | + | +                 | + | Guide  | +           | + | +                      | + |
| MjCbf5 | -   | + | -                 | + | MjCbf5 | -           | + | -                      | + |

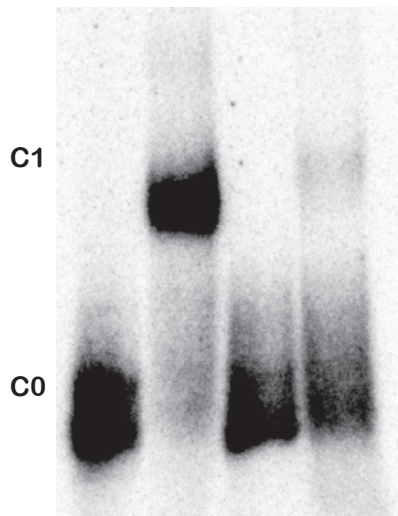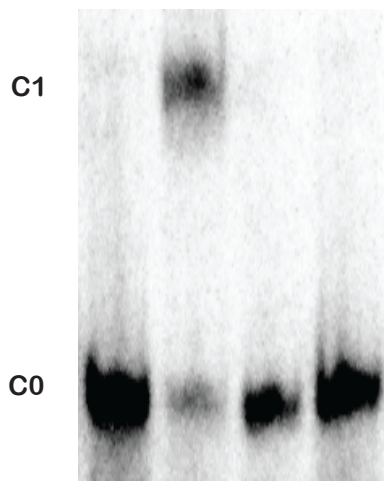

|        | SL2 |   | mSL2<br>(ACA-UGU) |   |
|--------|-----|---|-------------------|---|
| Guide  | +   | + | +                 | + |
| MjCbf5 | -   | + | -                 | + |

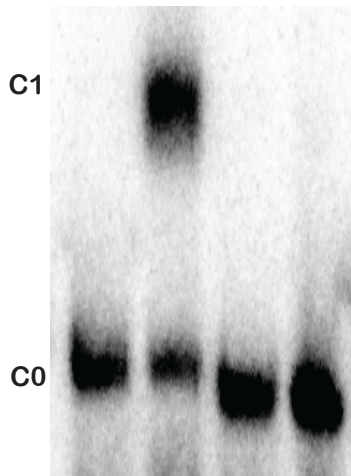

|        | 1940<br>Guide |   | m1940<br>(ACA-UGU) |   |        | 1942<br>Guide |   | m1942<br>(ACA-UGU) |   |
|--------|---------------|---|--------------------|---|--------|---------------|---|--------------------|---|
| Guide  | +             | + | +                  | + | Guide  | +             | + | +                  | + |
| MjCbf5 | -             | + | -                  | + | MjCbf5 | -             | + | -                  | + |

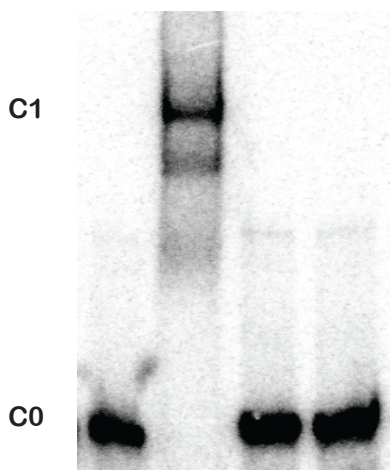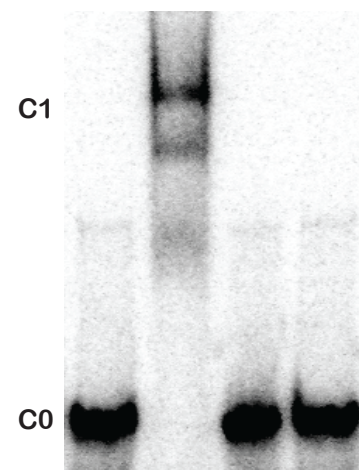

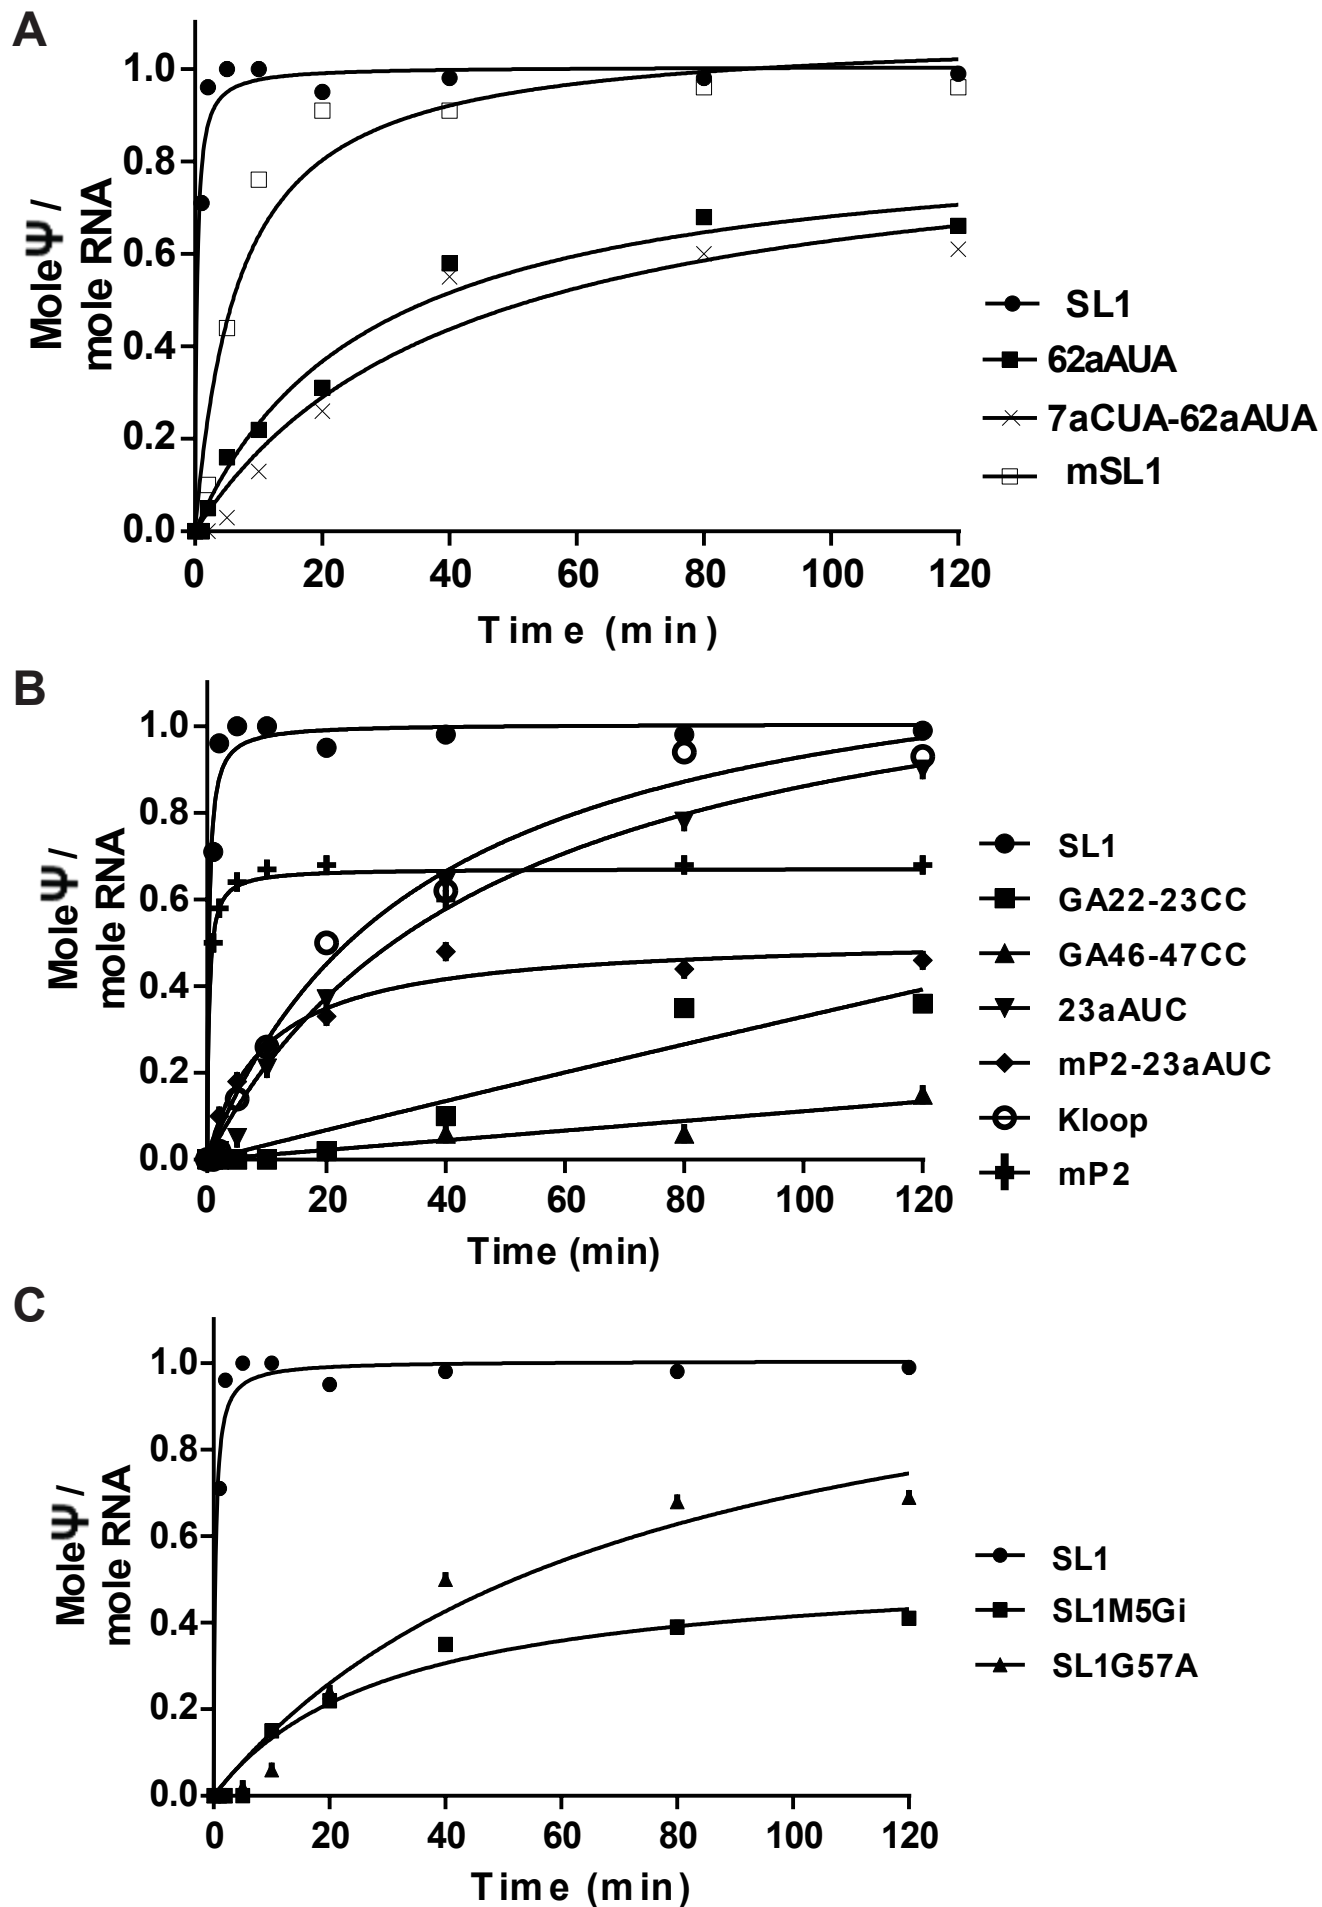

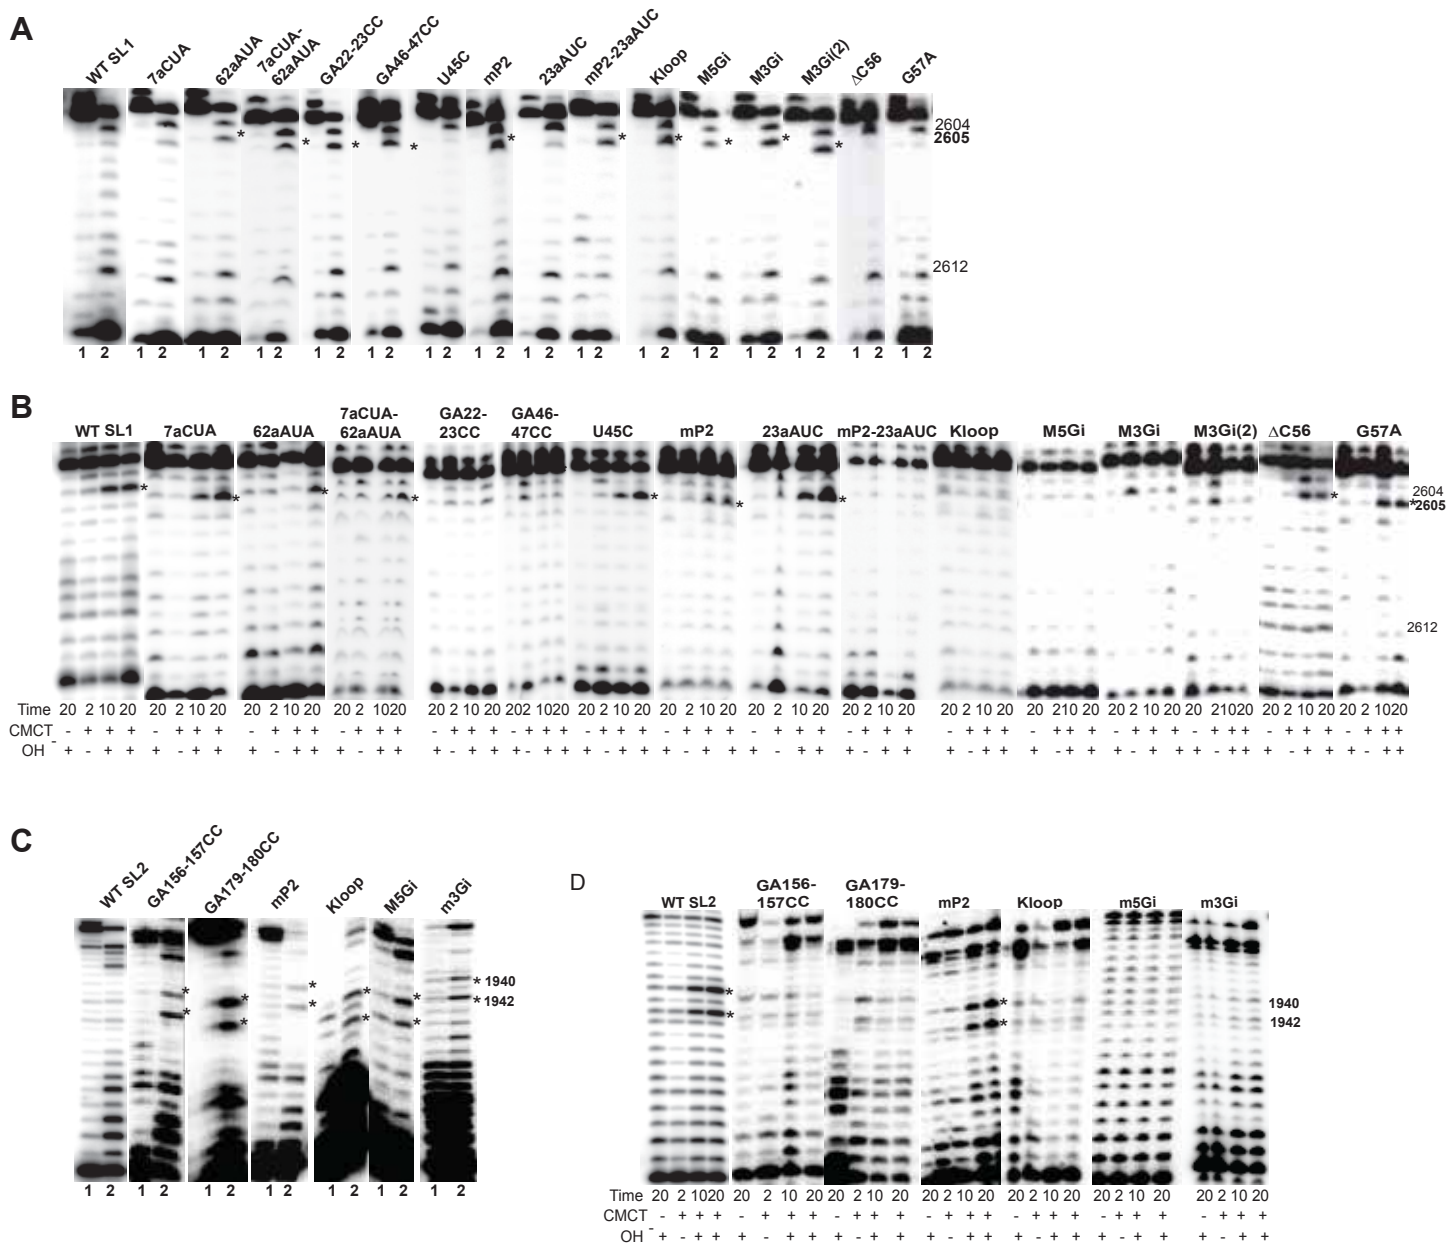

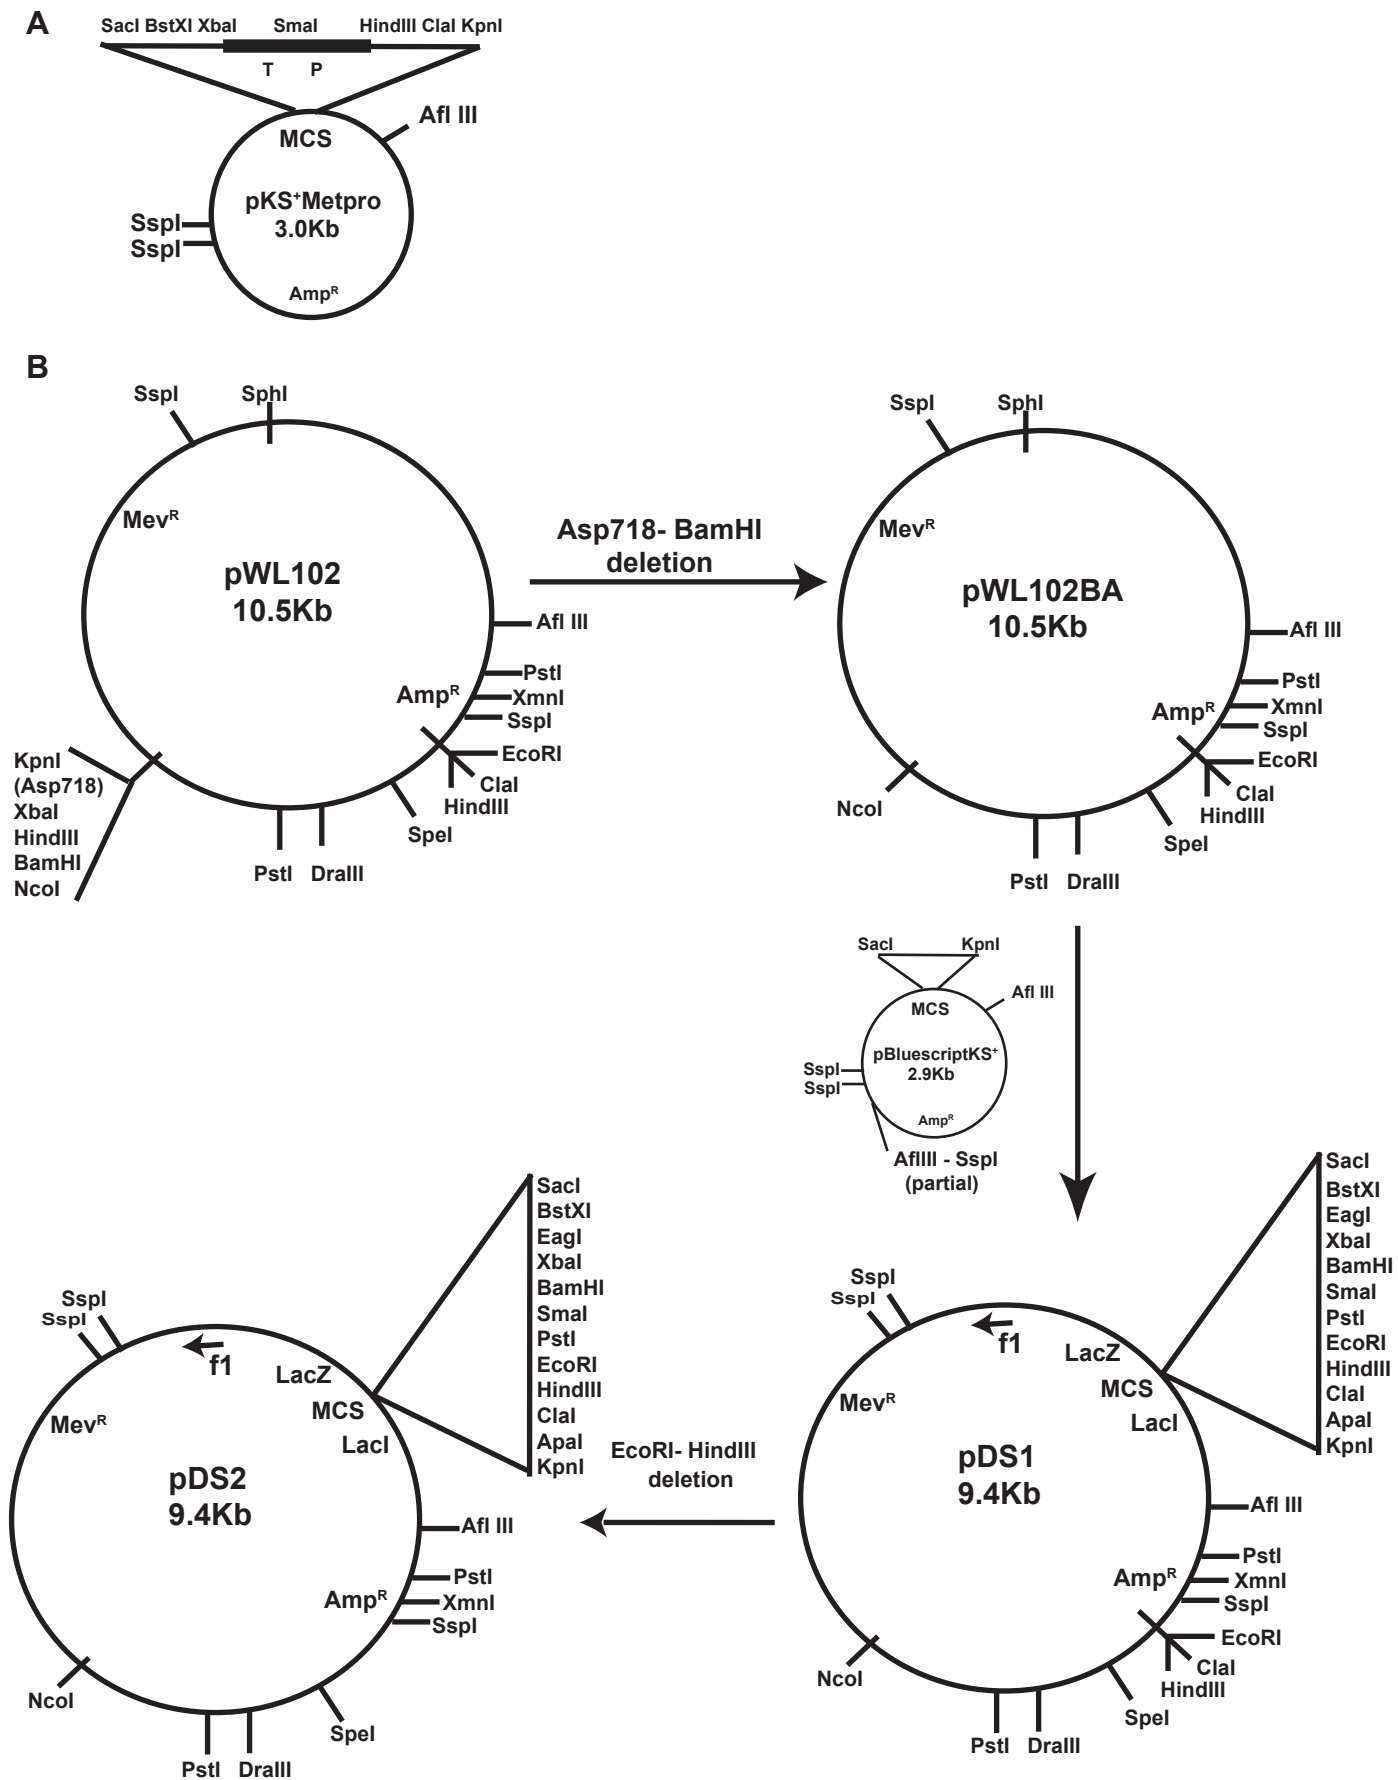

Figure S7

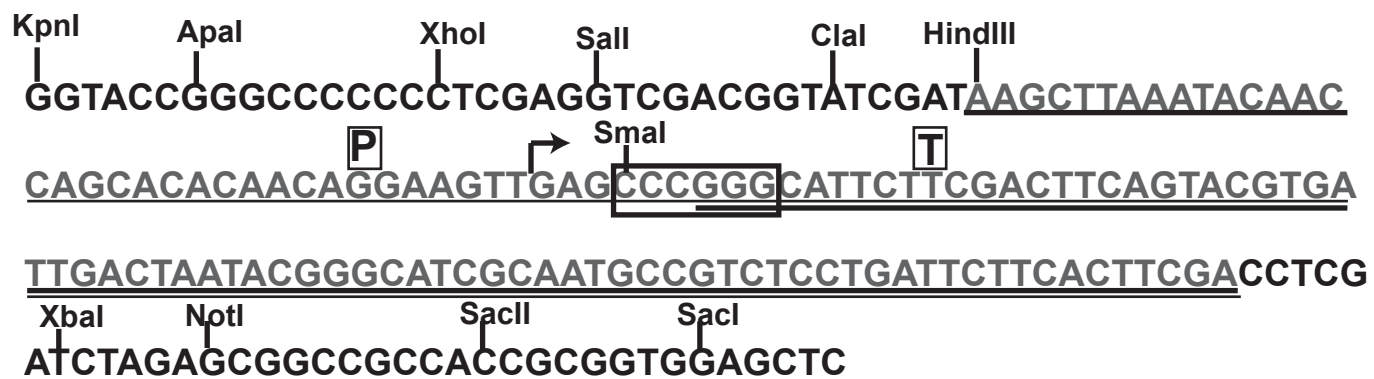

A

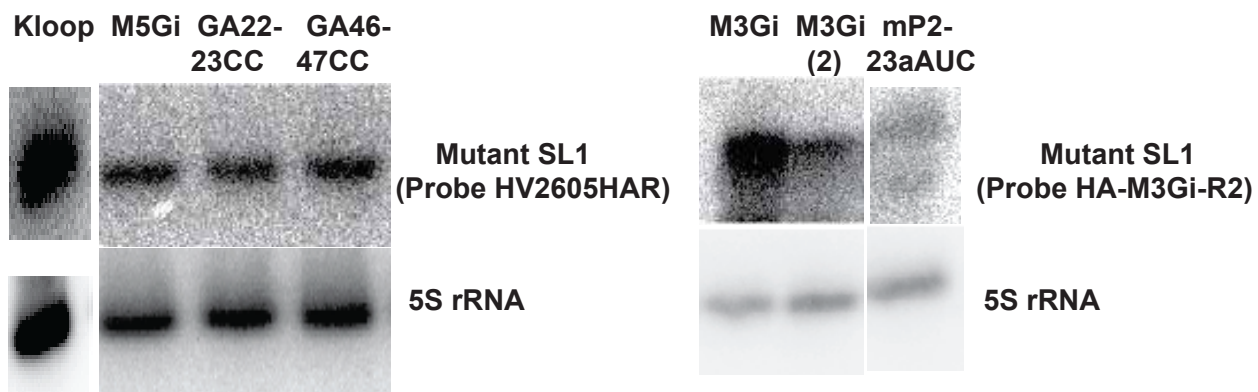

B

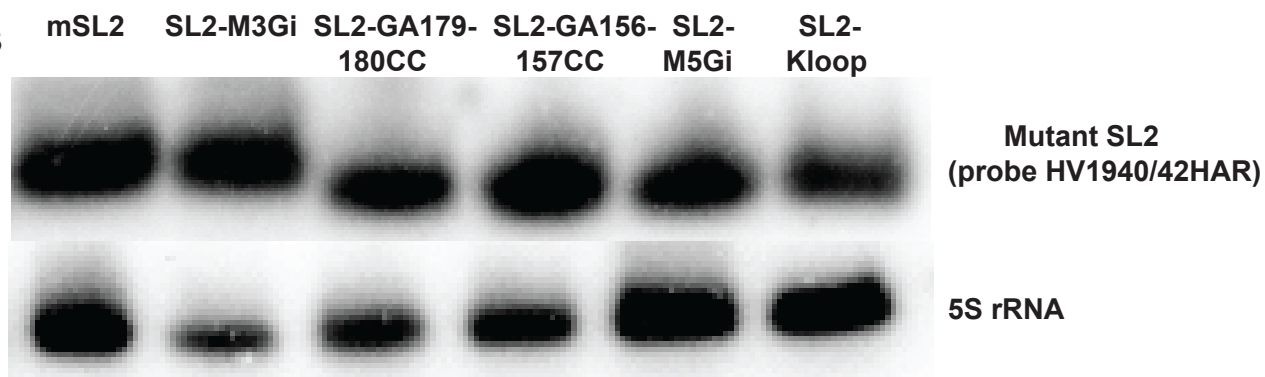

Figure S9

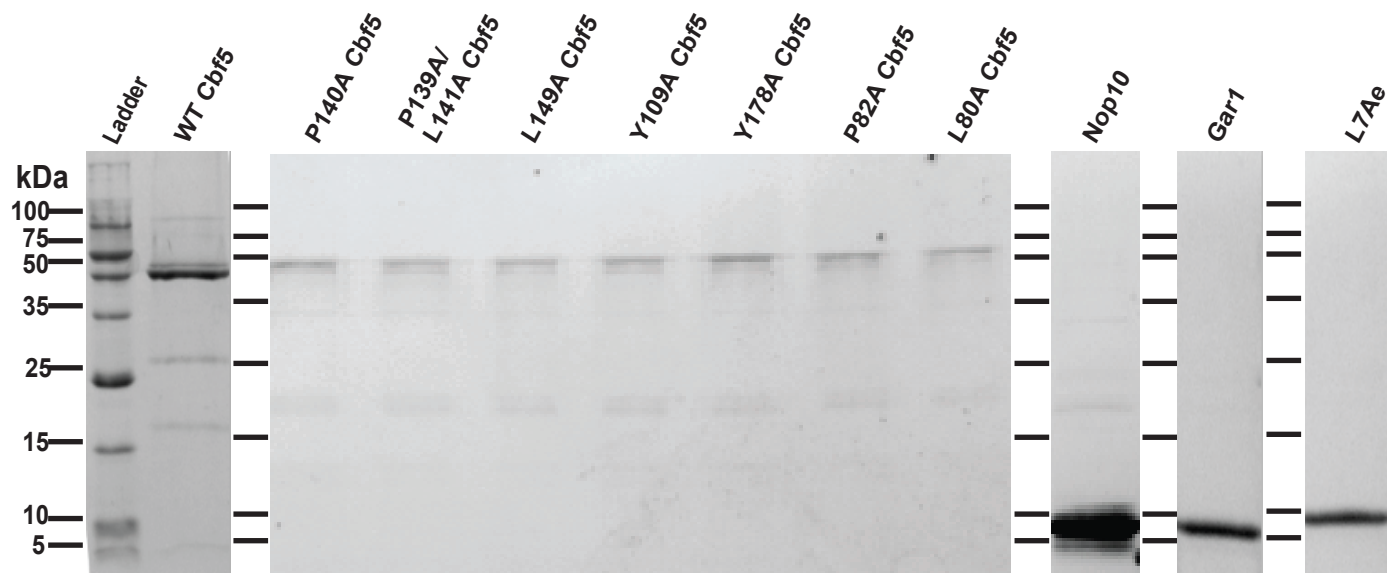

**Supplemental Table S1: List of oligonucleotides used in this work and their functions**

| Oligonucleotide                                                                                         | Sequence                                                               | Purpose                                                                                                          |
|---------------------------------------------------------------------------------------------------------|------------------------------------------------------------------------|------------------------------------------------------------------------------------------------------------------|
| <b>Primers used to detect and clone sR-h45 gene and its shorter versions, and for northern analyses</b> |                                                                        |                                                                                                                  |
| HV1940/42HAR                                                                                            | GTG TCG CCC AGA ACA CTA<br>ACG GCC G                                   | Probe 1 of Fig.1A. Also used as reverse primer for PCR to produce most SL2 guide RNA.                            |
| HV2605HAR                                                                                               | CTA TTG CGC ACC CGG GTT<br>CGC CG                                      | Probe 2 of Fig.1A. Also used as reverse primer for PCR to produce most SL1 guide RNA.                            |
| HVHAMID-F                                                                                               | GTC CAG CGT CAC CGA CTG<br>TCT GAG                                     | Forward primer starting ~200b upstream of sR-h45 gene, primer 1 of Fig. 1B.                                      |
| HVHA-ER                                                                                                 | GGG CTG CAG <u>GAA TTC</u> TGA<br>GCA GCC TCG GCA AGG TGT<br>TCC       | Reverse primer starting ~1000b downstream of sR-h45 gene, has 14 extra bases at the 5' end, primer 2 of Fig. 1B. |
| 2605HA-F                                                                                                | CGC GAA TTC GGG TGC GTA<br>CCT CAA GTC CC                              | Forward primer at the 5' end of sR-h45 gene, has 13 extra bases at the 5' end, primer 3 of Fig. 1B.              |
| 1940/42HA-R                                                                                             | GCG <u>CAA GCT TGT</u> GTC GCC<br>CAG AAC ACT AAC GGC CG.              | Reverse primer at the 3' end of sR-h45 gene, has 9 extra bases at the 5' end, primer 4 of Fig. 1B.               |
| HVHA-F2                                                                                                 | CCG GCA GCT GGG TGC GTA<br>CCT CAA GTC CC                              | Forward primer to amplify sR-h45 DNA, has <i>PvuII</i> site, used to clone sR-h45 in pKS <sup>+</sup> Metpro.    |
| HVHA-R                                                                                                  | GCC <u>CTT TAA AGG</u> TGT CGC<br>CCA GAA CAC TAA CGG                  | Reverse primer to amplify sR-h45 DNA, has <i>DraI</i> site, used to clone sR-h45 in pKS <sup>+</sup> Metpro.     |
| HV-dL-F                                                                                                 | GGC GAA CCC GGG TGC GCA<br>ATA GCT ACC GCC CGG CAC<br>GAG GGT TTC CCG  | Forward primer to delete linker between SL1 and SL2 (position 77-130) in pHsR-h45 to produce pΔLinker.           |
| HV-dL-R                                                                                                 | CGG GAA ACC CTC GTG CCG<br>GGC GGT AGC TAT TGC GCA<br>CCC GGG TTC GCC  | Reverse primer to delete linker between SL1 and SL2 (position 77-130) in pHsR-h45 to produce pΔLinker.           |
| HA-dLST2-F                                                                                              | CGG CGA ACC CGG GTG<br><u>CGC ACA</u> CCT TTG GGC ATT<br>CTT CGA CTT C | Forward primer to delete linker and SL2 of sR-h45 to produce pHSL1.                                              |
| HA-dLST2-R                                                                                              | GAA GTC GAA GAA TGC CCA<br>AAG <u>GTG TGC</u> GCA CCC GGG<br>TTC GCC G | Reverse primer to delete linker and SL2 of sR-h45 to produce pHSL1.                                              |

|             |                                                                      |                                                                     |
|-------------|----------------------------------------------------------------------|---------------------------------------------------------------------|
| HA-dLST2-F2 | GGC GAA CCC GGG TGC GCA<br>ATA GCT ACC TTT GGG CAT<br>TCT TCG ACT TC | Forward primer to delete linker and SL2 of sR-h45 to produce pHSL2. |
| HA-dLST2-R2 | GAA GTC GAA GAA TGC CCA<br>AAG GTA GCT ATT GCG CAC<br>CCG GGT TCG CC | Reverse primer to delete linker and SL2 of sR-h45 to produce pHSL2. |
| 5S rRNA     | CCT CAC CGC TCT GGC CGC<br>C                                         | Complementary to <i>H. volcanii</i> 5S sequence, near its 3'-end.   |

**Primers to detect in vivo production of  $\Psi$**

|         |                         |                                                             |
|---------|-------------------------|-------------------------------------------------------------|
| HVLSUR1 | GCA AGG TAC TAC GCT ACC | Primer to determine $\Psi$ 1940 and $\Psi$ 1942 production. |
| HVLSUR2 | GCA GCC GAC CTG TCT C   | Primer to determine $\Psi$ 2605 production.                 |

**Primers to mutate plasmids**

|                |                                                                  |                                                            |
|----------------|------------------------------------------------------------------|------------------------------------------------------------|
| HA-dA71-F      | CGA ACC CGG GTG CGC ATA<br>GCT ACC TTT GGG CAT TCT<br>TCG        | Forward primer to delete A71 in pHSL1.                     |
| HA-dA71-R      | CGA AGA ATG CCC AAA GGT<br>AGC TAT GCG CAC CCG GGT<br>TCG        | Reverse primer to delete A71 in pHSL1.                     |
| HA-62aATA-F    | GAC AGC ACG GCG AAC CCA<br>TAG GGT GCG CAA TAG CTA<br>CC         | Forward primer to insert ATA after residue 62 in pHsR-h45. |
| HA-62aATA-R    | GGT AGC TAT TGC GCA CCC<br>TAT GGG TTC GCC GTG CTG<br>TC         | Reverse primer to insert ATA after residue 62 in pHsR-h45. |
| HA-7aCTA-F2    | GGA AGT TGA GCG TAC CCT<br>ATC AAG TCC CCG GCC G                 | Forward primer to change U8 of SL1 in pHSL1 to CUA.        |
| HA-7aCTA-R2    | CGG CCG GGG ACT TGA TAG<br>GGT ACG CTC AAC TTC C                 | Reverse primer to change U8 of SL1 in pHSL1 to CUA.        |
| HA-ATA72TGT-F2 | CGA ACC CGG GTG CGC ATG<br>TGC TAC CTT TGG GCA TTC<br>TTC G      | Forward primer to create ATA72TGT in pHSL1.                |
| HA-ATA72TGT-R2 | CGA AGA ATG CCC AAA GGT<br>AGC ACA TGC GCA CCC GGG<br>TTC G      | Reverse primer to create ATA72TGT in pHSL1.                |
| HA-ACA205TGT-F | GCC GTT AGT GTT CTG GGC<br>GTG TCC TTT GGG CAT TCT<br>TCG ACT TC | Forward primer to create ACA205TGT mutation in pHSL2       |
| HA-ACA205TGT-R | GAA GTC GAA GAA TGC CCA<br>AAG GAC ACG CCC AGA ACA<br>CTA ACG GC | Reverse primer to create ACA205TGT mutation in pHSL2       |

|              |                                                                                         |                                                                                                                                       |
|--------------|-----------------------------------------------------------------------------------------|---------------------------------------------------------------------------------------------------------------------------------------|
| HA-GA22CC-F  | GTA CCT CAA GTC CCC GGC<br>CCC GTG TTC CCG CTT CGG<br>GAG C                             | Forward primer to create GA22CC mutation in pHsR-h45.                                                                                 |
| HA-GA22CC-R  | GCT CCC GAA GCG GGA ACA<br>CGG GGC CGG GGA CTT<br>GAG GTA C                             | Reverse primer to create GA22CC mutation in pHsR-h45.                                                                                 |
| HA-GA46CC-F  | CGC TTC GGG AGC GAT CCC<br>AGC ACG GCG AAC C                                            | Forward primer to create GA46CC mutation in pHsR-h45.                                                                                 |
| HA-GA46CC-R  | GGT TCG CCG TGC TGG GAT<br>CGC TCC CGA AGC G                                            | Reverse primer to create GA46CC mutation in pHsR-h45.                                                                                 |
| HA-GA156CC-F | GCA CGA GGG TTT CCC GGT<br>CCC CGC GGC ACG CCG CCT<br>CGG G                             | Forward primer to create GA156CC mutation in pHsR-h45.                                                                                |
| HA-GA156CC-R | CCC GAG GCG GCG TGC<br>CGC GGG GAC CGG GAA<br>ACC CTC GTG C                             | Reverse primer to create GA156CC mutation in pHsR-h45.                                                                                |
| HA-GA179CC-F | GCA CGC CGC CTC GGG ATC<br>CGA CCG GCC GTT AGT GTT<br>CTG G                             | Forward primer to create GA179CC mutation in pHsR-h45.                                                                                |
| HA-GA179CC-R | CCA GAA CAC TAA CGG CCG<br>GTC GGA TCC CGA GGC GGC<br>GTG C                             | Reverse primer to create GA179CC mutation in pHsR-h45.                                                                                |
| HA-mP2-F     | CCT CAA GTC CCC GTG CTG<br>GAG TGT TCC GCT TCG G                                        | Forward primer inserting residues to make perfect pairs in lower part of P2 stem of SL1 in pHsR-h45.                                  |
| HA-mP2-R     | CCG AAG CGG AAC ACT CCA<br>GCA CGG GGA CTT GAG G                                        | Reverse primer inserting residues to make perfect pairs in lower part of P2 stem of SL1 in pHsR-h45.                                  |
| HA-mP2-F2    | GAG GGT TTC CCG GTC GGG<br>ACG CGG CAC GCC GCC TCG<br>GGA TGA CCG ACC GGC CGT<br>TAG TG | Forward primer making eight perfect pairs in lower part of P2 stem of SL2 in pHsR-h45.                                                |
| HA-mP2-R2    | CAC TAA CGG CCG GTC GGT<br>CAT CCC GAG GCG GCG TGC<br>CGC GTC CCG ACC GGG AAA<br>CCC TC | Reverse primer making eight perfect pairs in lower part of P2 stem of SL2 in pHsR-h45.                                                |
| HA-23aATC-F2 | CCT CAA GTC CCC GTG CTG<br>GAA TCG TGT TCC CGC TTC<br>GGG AGC                           | Forward primer to insert ATC between residues 23 & 24 and residues to make perfect pairs in lower part of P2 stem of SL1 in pHsR-h45. |
| HA-23aATC-R2 | GCT CCC GAA GCG GGA ACA<br>CGA TTC CAG CAC GGG GAC<br>TTG AGG                           | Reverse primer to insert ATC between residues 23 & 24 and residues to make perfect pairs in                                           |

|            |                                                                         |                                                                                                                     |
|------------|-------------------------------------------------------------------------|---------------------------------------------------------------------------------------------------------------------|
|            |                                                                         | lower part of P2 stem in SL1 in pHsR-h45.                                                                           |
| HA-KL-F    | CGT ACC TCA AGT CCC CGG<br>CCG ATC GAT GAC AGC ACG<br>GCG AAC CC        | Forward primer to create K-loop in upper part of P2 stem of SL1 in pHsR-h45.                                        |
| HA-KL-R    | GGG TTC GCC GTG CTG TCA<br>TCG ATC GGC CGG GGA CTT<br>GAG GTA CG        | Reverse primer to create K-loop in upper part of P2 stem of SL1 in pHsR-h45.                                        |
| HA-KL-F2   | GGC ACG AGG GTT TCC CGG<br>TCG ATG GAT GAG ACC GGC<br>CGT TAG TG        | Forward primer to create K-loop in P2 stem of SL2 in pHsR-h45.                                                      |
| HA-KL-R3   | CAC TAA CGG CCG GTC TCA<br>TCC ATC GAC CGG GAA ACC<br>CTC GTG CC        | Reverse primer to create K-loop in P2 stem of SL2 in pHsR-h45                                                       |
| HA-M5Gi-F  | CGA AAG ACG GAC CGC CCG<br>GCA CCT CCC ATT CCC GGT<br>CGA CGC GGC ACG C | Forward primer to change 5' guide GAGGGT sequence of SL2 to CTCCCA in pHsR-h45.                                     |
| HA-M5Gi-R  | GCG TGC CGC GTC GAC CGG<br>GAA TGG GAG GTG CCG GGC<br>GGT CCG TCT TTC G | Reverse primer to change 5' guide GAGGGT sequence of SL2 to CTCCCA in pHsR-h45.                                     |
| HA-M5Gi-F2 | GAA GTT GAG CGT ACC TCA<br>ACA GCC CGG CCG AGT GTT<br>CC                | Forward primer to change 5' guide GTC sequence of SL1 to CAG in pHsR-h45.                                           |
| HA-M5Gi-R2 | GGA ACA CTC GGC CGG GCT<br>GTT GAG GTA CGC TCA ACT<br>TC                | Reverse primer to change 5' guide GTC sequence of SL1 to CAG in pHsR-h45.                                           |
| HA-M3Gi-F  | CCT CGG GAT GAG ACC GGC<br>CCA ATG TGT TCT GGG CGA<br>CAC C             | Forward primer to change 3' guide GTTA sequence of SL2 in pHsR-h45 to CAAT                                          |
| HA-M3Gi-R  | GGT GTC GCC CAG AAC ACA<br>TTG GGC CGG TCT CAT CCC<br>GAG G             | Reverse primer to change 3' guide GTTA sequence of SL2 in pHsR-h45 to CAAT.                                         |
| HA-M3Gi-F2 | GGA GCG ATG ACA GCA CGG<br>CGT TGG AGG GTG CGC AAT<br>AGC TAC C         | Forward primer to change 3' guide AACCC sequence of SL1 in pHsR-h45 to TTGGA.                                       |
| HA-M3Gi-R2 | GGT AGC TAT TGC GCA CCC<br>TCC AAC GCC GTG CTG TCA<br>TCG CTC C         | Reverse primer to change 3' guide AACCC sequence of SL1 in pHsR-h45 to TTGGA. Also used as probe in Northern Blots. |
| HA-M3Gi-F3 | GGA GCG ATG ACA GCA CGG<br>CGA ACG AGG GTG CGC AAT<br>AGC TAC C         | Forward primer to change 3' guide AACCC sequence of SL1 in pHsR-h45 to AACGA.                                       |
| HA-M3Gi-R3 | GGT AGC TAT TGC GCA CCC<br>TCG TTC GCC GTG CTG TCA<br>TCG CTC C         | Reverse primer to change 3' guide AACCC sequence of SL1 in pHsR-h45 to AACGA.                                       |

|           |                                                                 |                                                     |
|-----------|-----------------------------------------------------------------|-----------------------------------------------------|
| HA-G57A-F | CGA TGA CAG CAC GGC <u>AAA</u><br>CCC GGG TGC GCA ATA GC        | Forward primer to create G57A mutation in pHsR-h45. |
| HA-G57A-R | GCT ATT GCG CAC CCG GGT<br>TTG CCG TGC TGT CAT CG               | Reverse primer to create G57A mutation in pHsR-h45  |
| HA-dC56-F | GCG ATG ACA GCA <u>CGG</u> <u>GAA</u><br>CCC GGG TGC GCA ATA GC | Forward primer to delete C56 of SL1 in pHsR-h45.    |
| HA-dC56-R | GCT ATT GCG CAC CCG GGT<br><u>TCC</u> CGT GCT GTC ATC GC        | Reverse primer to delete C56 of SL1 in pHsR-h45.    |

| Primers for PCR to prepare guide RNAs |                                                                |                                                                                                                                                                  |
|---------------------------------------|----------------------------------------------------------------|------------------------------------------------------------------------------------------------------------------------------------------------------------------|
| T7HV2605HAF2                          | TAA TAC GAC TCA CTA TAG<br>CGT ACC TCA AGT CCC <u>CGG</u>      | RNA polymerase T7 promoter (17 nt) followed by 19 nt of SL1 of sR-h45 to produce Ψ2605. Also used as forward primer for PCR to produce most SL1 guide RNA.       |
| T7HV2605mHAF                          | TAA TAC GAC TCA CTA TAG<br>GCG TAC CTC AAC <u>AGC</u> CCG<br>G | RNA polymerase T7 promoter (17 nt) followed by a G and 19 nt of 5' guide mutant of SL1 of sR-h45.                                                                |
| HV2605HAR2                            | <u>CTG</u> TGC GCA CCC GGG TTC<br>GCC G                        | Reverse primer to produce SL1 changing AAUA to ACA.                                                                                                              |
| HV2605HAR3                            | CTA <u>TGC</u> GCA CCC GGG TTC<br>GCC G                        | Reverse primer to produce SL1 changing AAUA to AUA.                                                                                                              |
| HV2605HAR4                            | <u>CTT</u> TTG CGC ACC CGG GTT<br>CGC CG                       | Reverse primer to produce SL1 changing AAUA to AAAA.                                                                                                             |
| HV2605HAR5                            | <u>CAC</u> ATG CGC ACC CGG GTT<br>CGC CG                       | Reverse primer to produce SL1 changing AAUA to AUGU.                                                                                                             |
| HV2605HAR6                            | CTG TTG CGC ACC <u>CTA</u> <u>TGG</u><br>GTT CGC               | Reverse primer to produce SL1 with AUA inserted after residue 62.                                                                                                |
| HV2605HAR7                            | CTG TTG CGC ACC <u>CTC</u> <u>CAA</u><br>CGC CG                | Reverse primer to produce SL1 with 3' guide sequence changed from AACCC to TTGGA.                                                                                |
| T7HV2605HAF3                          | TAA TAC GAC TCA CTA TAG<br>CGT ACC TCA AGT CCC CG              | RNA polymerase T7 promoter (17 nt) followed by 18 nt of SL1 of sR-h45 to produce Ψ2605.                                                                          |
| T7HV2605HAF4                          | TAA TAC GAC TCA CTA TAG<br>CGT ACC <u>CTA</u> TCA AGT CC       | RNA polymerase T7 promoter (17 nt) followed by 18 nt of SL1 (inserting CUA in P1 stem) to produce Ψ2605.                                                         |
| HV2605HAR9                            | CTA TTG CGC ACC CGG GTT<br><u>TGC</u> CGT GC                   | Reverse primer to produce SL2 with G57 changed to A57.                                                                                                           |
| HV2605HAR10                           | GCG CAC CCG GGT TCG CCG<br>TGC                                 | Reverse primer to produce SL2 with deleted ACA region.                                                                                                           |
| T7HV1940/42HAF                        | TAA TAC GAC TCA CTA TAG<br>GAC CGC CCG GCA CGA GG              | RNA polymerase T7 promoter (17 nt) followed by 18 nt of SL2 of sR-h45 to produce Ψ1940/Ψ1942. Also used as forward primer for PCR to produce most SL2 guide RNA. |

|                        |                                                                        |                                                                                                                  |
|------------------------|------------------------------------------------------------------------|------------------------------------------------------------------------------------------------------------------|
| HV1940/42HAR3          | AGG <u>ACA</u> CGC CCA GAA CAC<br>TAA CGG CCG GTC                      | Reverse primer to produce SL2 with ACA changed to TGT,                                                           |
| HV1940/42HAR4          | GTG TCG CCC AGA <u>ACT</u> AAC<br>GGC CG                               | Reverse primer to produce SL2 with deletion of GU (193-194).                                                     |
| HV1940/42HAR5          | GTG TCG CCC AGA <u>ACT</u> AAC<br><u>TAC</u> CG                        | Reverse primer to produce SL2 with deletion of GU (193-194) and changing CC (187-188) to UA.                     |
| HV1940/1942HAR<br>6    | <u>GAC</u> <u>ACG</u> CCC AGA ACA CTA<br>AC                            | Reverse primer for Ψ1940 of artificial perfect 1940 guide with box ACA changed to UGU.                           |
| HV1940/1942HAR<br>7    | <u>GAC</u> <u>ACG</u> CCC AGA ACTA AC                                  | Reverse primer for Ψ1942 of artificial perfect 1942 guide with box ACA changed to UGU.                           |
| HA-dTTC147-F           | CCG CCC GGC ACG AGG <u>GTC</u><br>CGG TCG ACG CGG CAC G                | Forward primer to delete TTC (147-149) of SL2 cloned in pKS <sup>+</sup> Metpro.                                 |
| HA-dTTC147-R           | CGT GCC GCG TCG ACC <u>GGA</u><br>CCC TCG TGC CGG GCG G                | Reverse primer to delete TTC (147-149) of SL2 cloned in pKS <sup>+</sup> Metpro.                                 |
| HA-TTC147CA-F          | CCG CCC GGC ACG AGG <u>GTC</u><br><u>ACC</u> GGT CGA CGC GGC ACG       | Forward primer to change TTC (147-149) of SL2 cloned in pKS <sup>+</sup> Metpro to CA.                           |
| HA-TTC147CA-R          | CGT GCC GCG TCG ACC <u>GGT</u><br><u>GAC</u> CCT CGT GCC GGG CGG       | Reverse primer to change TTC (147-149) of SL2 cloned in pKS <sup>+</sup> Metpro to CA.                           |
| HA-dCC187-F            | CTC GGG ATG AGA CCG <u>GGT</u><br>TAG TGT TCT GGG CGA CAC              | Forward primer to delete CC (187-188) of SL2 cloned in pKS <sup>+</sup> Metpro.                                  |
| HA-dCC187-R            | GTG TCG CCC AGA ACA CTA<br><u>ACC</u> CGG TCT CAT CCC GAG              | Reverse primer to delete CC (187-188) of SL2 cloned in pKS <sup>+</sup> Metpro.                                  |
| HA-CC187TA-F           | CTC GGG ATG AGA CCG <u>GTA</u><br>GTT AGT GTT CTG GGC GAC<br>AC        | Forward primer to change CC (187-188) of SL2 cloned in pKS <sup>+</sup> Metpro to TA.                            |
| HA-CC187TA-R           | GTG TCG CCC AGA ACA TCA<br><u>ACT</u> <u>ACC</u> GGT CTC ATC CCG<br>AG | Reverse primer to change CC (187-188) of SL2 cloned in pKS <sup>+</sup> Metpro to TA.                            |
| HA-d187CC-<br>194aCC-F | GAT GAG ACC GGG TTA <u>GTC</u><br><u>CGT</u> TCT GGG CGA CAC           | Forward primer to delete CC (187-188) and insert CC after position 194 of SL2 cloned in pKS <sup>+</sup> Metpro. |
| HA-d187CC-<br>a194CC-R | GTG TCG CCC AGA ACG <u>GAC</u><br>TAA <u>CCC</u> GGT CTC ATC           | Reverse primer to delete CC (187-188) and insert CC after position 194 of SL2 cloned in pKS <sup>+</sup> Metpro. |
| HA-G181T-F             | CGC CGC CTC GGG ATG <u>ATA</u><br>CCG GCC GTT AGT G                    | Forward primer to create G181T mutation in SL2 cloned in pKS <sup>+</sup> Metpro.                                |
| HA-G181T-R             | CAC TAA CGG CCG <u>GTA</u> <u>TCA</u><br>TCC CGA GGC GGC G             | Reverse primer to create G181T mutation in SL2 cloned in pKS <sup>+</sup> Metpro.                                |

|                            |                                                                |                                                                                                                     |
|----------------------------|----------------------------------------------------------------|---------------------------------------------------------------------------------------------------------------------|
| HA-<br>CC187TAdGT<br>193-F | CGG GAT GAG ACC GGT <u>AGT</u><br><u>TAG</u> TTC TGG GCG ACA C | Forward primer to change CC (187-188) to TA and delete GT (193-194) of SL2 cloned in pKS <sup>+</sup> Metpro to CA. |
| HA-<br>CC187TAdGT193-<br>R | GTG TCG CCC AGA <u>ACT</u> AAC<br><u>TAC</u> CGG TCT CAT CCC G | Reverse primer to change CC (187-188) to TA and delete GT (193-194) of SL2 cloned in pKS <sup>+</sup> Metpro to CA. |
| HA-dGT193-F                | GAG ACC GGC CGT <u>TAG</u> <u>TTC</u><br>TGG GCG ACA C         | Forward primer to delete GT (193-194) of SL2 cloned in pKS <sup>+</sup> Metpro.                                     |
| HA-dGT193-R                | GTG TCG CCC AGA <u>ACT</u> AAC<br>GGC CGG TCT <u>C</u>         | Reverse primer to delete GT (193-194) of SL2 cloned in pKS <sup>+</sup> Metpro.                                     |

| <b>Primers for PCR to prepare target RNAs</b> |                                                                                                    |                                                                                                         |
|-----------------------------------------------|----------------------------------------------------------------------------------------------------|---------------------------------------------------------------------------------------------------------|
| T7P                                           | TAA TAC GAC TCA CTA TA                                                                             | Upper strand of the T7 RNA polymerase promoter (-17 to -1).                                             |
| HV2605TGT-R3                                  | GCC GAC CTG TCT CAC GAC<br>GGT CTA AAC CCA GCT CAC<br>GAC CTA TAG TGA GTC GTA<br>TTA               | Lower strand to produce 40-mer target RNA (positions 2590-2629) to produce Ψ2605.                       |
| HV2605TGT-R4                                  | GCC GAC CTG TCT CAC GAC<br>GGT CTA <u>TTG</u> <u>GAA</u> GCT CAC<br>GAC CTA TAG TGA GTC GTA<br>TTA | Lower strand to produce a mutant 40-mer target RNA (positions 2590-2629) to produce Ψ2605.              |
| HV2605TGT-R5                                  | GCC GAC CTG TCT CAC GAC<br>GGT CTG AAC CCA GCT CAC<br>GAC CTA TAG TGA GTC GTA<br>TTA               | Lower strand to produce a mutant 40-mer target RNA (positions 2590-2629) changing U2605 to C2605.       |
| HV2605TGT-R6                                  | GCC GAC CTG TCT CAC GAC<br>GGT CTT AAC CCA GCT CAC<br>GAC CTA TAG TGA GTC GTA<br>TTA               | Lower strand to produce a mutant 40-mer target RNA (positions 2590-2629) changing U2605 to A2605.       |
| HV2605TGT-R7                                  | GCC GAC CTG TCT CAC GAC<br>GGT <u>CAG</u> AAC CCA GCT CAC<br>GAC CTA TAG TGA GTC GTA<br>TTA        | Lower strand to produce a mutant 40-mer target RNA (positions 2590-2629) changing UA2605-6 to CU2605-6. |
| HV2605TGT-R8                                  | GCC GAC CTG TCT CAC GAC<br>GGT <u>CAA</u> AAC CCA GCT CAC<br>GAC CTA TAG TGA GTC GTA<br>TTA        | Lower strand to produce a mutant 40-mer target RNA (positions 2590-2629) changing A2605 to U2605.       |
| HV1940/42TGT-R                                | TAC CTT AAG AGG GTC ATA<br>GTT <u>ACG</u> GGC GCT ATA GTG<br>AGT CGT ATT A                         | Lower strand to produce 29-mer target RNA (positions 1929-1957)                                         |

|                 |                                                                                                 |                                                                                                |
|-----------------|-------------------------------------------------------------------------------------------------|------------------------------------------------------------------------------------------------|
|                 |                                                                                                 | with GGG1932-35CCC change) to produce Ψ1940 and Ψ1942                                          |
| HV1940/42TGT-R2 | TAC CTT AAG AGG GTC <u>GTA</u><br>GTT <u>ACG</u> <u>GGC</u> GCT ATA GTG<br>AGT CGT ATT A        | Lower strand to produce 29-mer target RNA with T1942C change to produce Ψ1940 and block Ψ1942. |
| HV1940/42TGT-R4 | TAC CTT AAG AGG GTC <u>ATG</u><br>GTT <u>ACG</u> <u>GGC</u> GCT ATA GTG<br>AGT CGT ATT A        | Lower strand to produce 29-mer target RNA with T1940C change to produce Ψ1942 and block Ψ1940. |
| HV1940/42TGT-R5 | TAC CTT AAG AGG GTC <u>AAA</u><br>GTT <u>ACG</u> <u>GGC</u> GCT ATA GTG<br>AGT CGT ATT A        | Lower strand to produce 29-mer target RNA) to produce Ψ1940 and Ψ1942 with A1941 changed to U. |
| HV1940/42TGT-R6 | TAC CTT AAG AGG GTC <u>TAA</u><br>GTT <u>ACG</u> <u>GGC</u> GCT ATA <u>GTG</u><br>AGT CGT ATT A | Lower strand to make 29-mer target RNA for Ψ1940/Ψ1942 with AU (1941-42) changed to UA.        |
| HV1940/42TGT-R7 | TAC CTT AAG AGG GTC <u>AAG</u><br>TTA <u>CGG</u> <u>GCG</u> CTA TAG TGA<br>GTC GTA TTA          | Lower strand to produce 28-mer target RNA for Ψ1940/Ψ1942 with deletion of A1941.              |
| HV1940/42TGT-R8 | TAC CTT AAG AGG GTC <u>ACA</u><br>GTT <u>ACG</u> <u>GGC</u> GCT ATA GTG<br>AGT CGT ATT A        | Lower strand to produce 29-mer target RNA for Ψ1940/Ψ1942 with A1941 changed to G.             |
| HV1940/42TGT-R9 | TAC CTT AAG AGG <u>GTT</u> <u>AGA</u><br>GTT <u>ACG</u> <u>GGC</u> GCT ATA GTG<br>AGT CGT ATT A | Lower strand to make 29-mer target RNA for Ψ1940/Ψ1942 with A1941C & G1943A change.            |

| <b>Primers to generate <i>M. jannaschii</i> Cbf5 mutants for in vitro assays</b> |                                                                                 |                                                                                      |
|----------------------------------------------------------------------------------|---------------------------------------------------------------------------------|--------------------------------------------------------------------------------------|
| MJCBF-L80A-F                                                                     | GGA CAT GGT GGG ACA <u>GCA</u><br>GAC CCA AAG GTT ACT <u>GG</u>                 | Forward primer to change Leu80 (TTA) of <i>Mj</i> Cbf5 gene in pET28a to Ala (GCA).  |
| MJCBF-L80A-R                                                                     | CCA GTA ACC TTT GGG <u>TCT</u><br><u>GCT</u> GTC CCA CCA TGT CC                 | Reverse primer to change Leu80 (TTA) of <i>Mj</i> Cbf5 gene in pET28a to Ala (GCA).  |
| MJCBF-P140A-F                                                                    | GGA AGG ATT TAT CAG AGA<br>CCT <u>GCA</u> TTA AAA GCA GCT<br>GTT AAA AG         | Forward primer to change Pro140 (CGA) of <i>Mj</i> Cbf5 gene in pET28a to Ala (GCA). |
| MJCBF-P140A-R                                                                    | CTT TTA ACA GCT GCT TTT<br>AAT <u>GCA</u> GGT CTC TGA TAA<br>ATC CTT CC         | Reverse primer to change Pro140 (CGA) of <i>Mj</i> Cbf5 gene in pET28a to Ala (GCA). |
| MJCBF-L149A-F                                                                    | CAT TAA AAG CAG CTG TTA<br>AAA GAA GAG <u>CGA</u> GAA TTA<br>GGA AGA TTC        | Forward primer to change Leu149 (TTG) of <i>Mj</i> Cbf5 gene in pET28a to Ala (GCG). |
| MJCBF-L149A-R                                                                    | GAA TCT TCC TAA TTC <u>TCG</u><br><u>CTC</u> TTC TTT TAA CAG CTG<br>CTT TTA ATG | Reverse primer to change Leu149 (TTG) of <i>Mj</i> Cbf5 gene in pET28a to Ala (GCG). |

|                    |                                                                                    |                                                                                                                           |
|--------------------|------------------------------------------------------------------------------------|---------------------------------------------------------------------------------------------------------------------------|
| MJCBF-P139L141AA-F | GGA AGG ATT TAT CAG AGA<br><u>GCT</u> CCA <u>GCA</u> AAA GCA GCT<br>GTT AAA AGA AG | Forward primer to change Pro139 (CCT) and L141 (TTA) of <i>Mj</i> Cbf5 gene in pET28a to Ala (GCT and GCA, respectively). |
| MJCBF-P139L141AA-R | CTT CTT TTA ACA GCT GCT<br>TTT <u>GCT</u> GGA <u>GCT</u> CTC TGA<br>TAA ATC CTT CC | Reverse primer to change Pro139 (CCT) and L141 (TTA) of <i>Mj</i> Cbf5 gene to Ala (GCT and GCA, respectively).           |
| MJCBF-Y178A-F      | GGT TAA ATG TCA ATC TGG<br>GAC <u>TGC</u> TAT AAG GAA ATT<br>GTG TG                | Forward primer to change Tyr178 (TAT) of <i>Mj</i> Cbf5 gene to Ala (GCT).                                                |
| MJCBF-Y178A-R      | CAC ACA ATT TCC TTA TAG<br><u>CAG</u> TCC CAG ATT GAC ATT<br>TAA CC                | Reverse primer to change Tyr178 (TAT) of <i>Mj</i> Cbf5 gene to Ala (GCT).                                                |
| MJCBF-Y109A-F      | GCA CAT TCC ACC TAA GGA<br><u>GGC</u> TGT TTG TTT GAT GCA<br>TC                    | Forward primer to change Tyr109 (TAT) of <i>Mj</i> Cbf5 gene to Ala (GCT).                                                |
| MJCBF-Y109A-R      | GAT GCA TCA AAC AAA CAG<br><u>CCT</u> CCT TAG GTG GAA TGT<br>GC                    | Reverse primer to change Tyr109 (TAT) of <i>Mj</i> Cbf5 gene to Ala (GCT).                                                |
| MJCBF-P82A-F       | GGT GGG ACA TTA GAC <u>GCA</u><br>AAG GTT ACT GGT GTT <u>TTG</u><br>C              | Forward primer to change Pro82 (CCA) of <i>Mj</i> Cbf5 gene to Ala (GCA).                                                 |
| MJCBF-P82A-R       | GCA AAA CAC CAG TAA CCT<br>TTG <u>CGT</u> CTA ATG TCC CAC<br>C                     | Reverse primer to change Pro82 (CCA) of <i>Mj</i> Cbf5 gene to Ala (GCA).                                                 |
